# Supplementary material
Source: HighWire-hosted journal article supplement (https://qdcxjkg.com/highwire/filestream/113846/field_highwire_adjunct_files/0/ERJ_00349-2013_Disclosure_Anto.pdf)
Supplement: ERJ_00349-2013_Disclosure_Anto.pdf [file ERJ_00349-2013_Disclosure_Anto.pdf]

To view the full contents of this document, you need a later version of the PDF viewer. You can upgrade to the latest version of Adobe Reader from [www.adobe.com/products/acrobat/readstep2.html](http://www.adobe.com/products/acrobat/readstep2.html)

For further support, go to [www.adobe.com/support/products/acrreader.html](http://www.adobe.com/support/products/acrreader.html)
